# Supplementary material
Source: PubMed Central journal article supplement (PMC2876680)
Supplement: supp_30_12_2983__1.pdf [file supp_30_12_2983__1.pdf]

## Supplementary Information

## Multiple E2F-induced microRNAs prevent replicative stress in response to mitogenic signalling

by Bueno *et al.*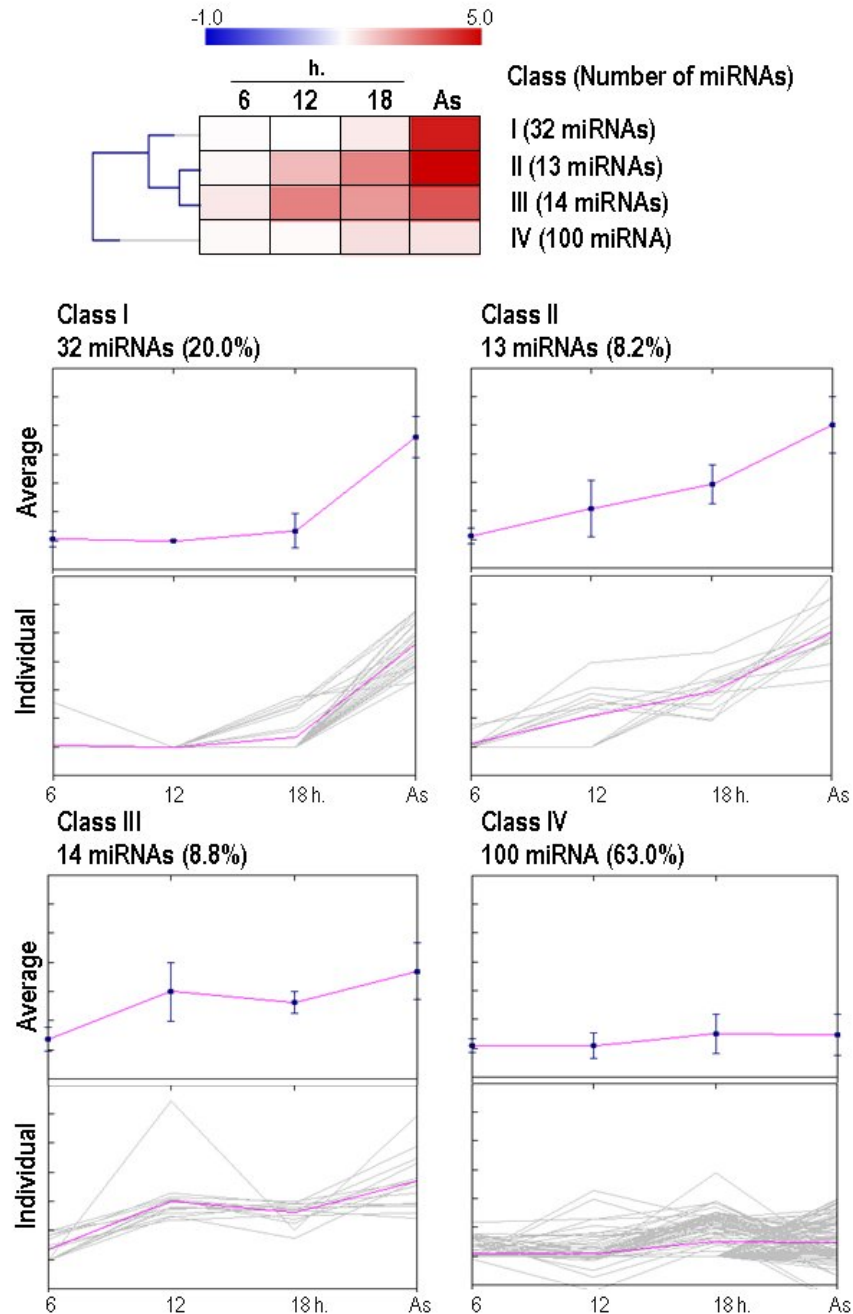

**Supplementary Figure 1.** SOTA analysis of miRNA expression pattern during entry into the cell cycle and G1/S transition. A, miRNAs expression was scored 6, 12 and 18 after stimulation with serum or in asynchronously growing (As) cells. miRNAs were classified into 4 classes (I-IV) and the individual profiles are shown for the members of each of these classes.

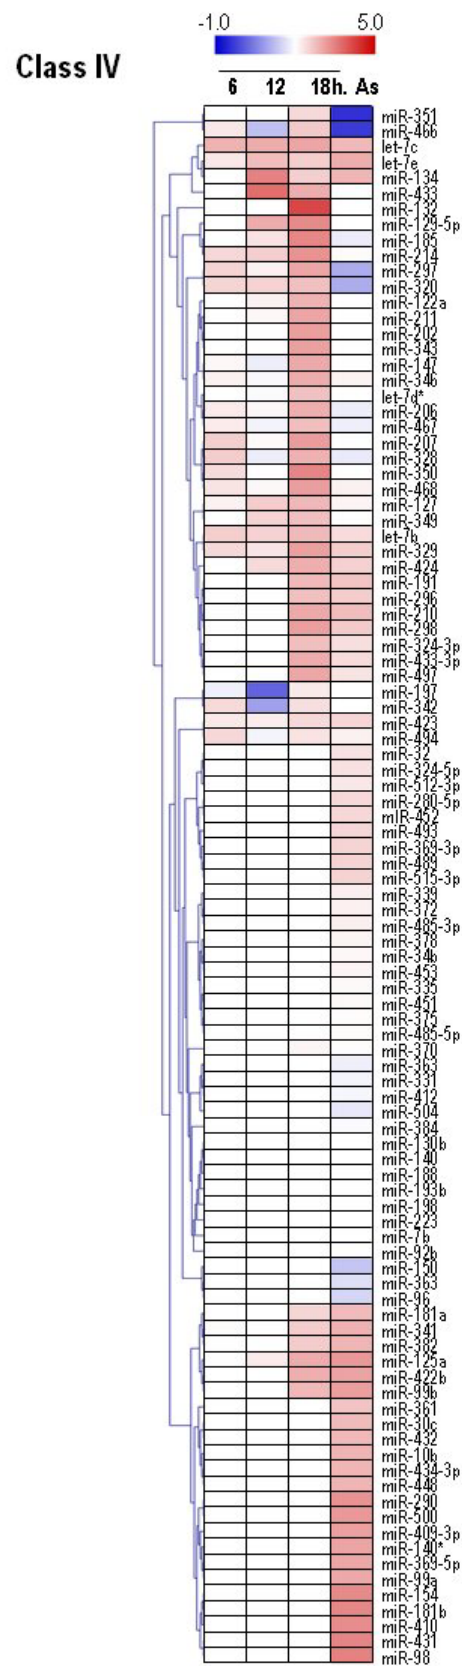

**Supplementary Figure 2.** Expression profiles of individual miRNAs belonging to Class IV (not significantly induced upon stimulation with serum).

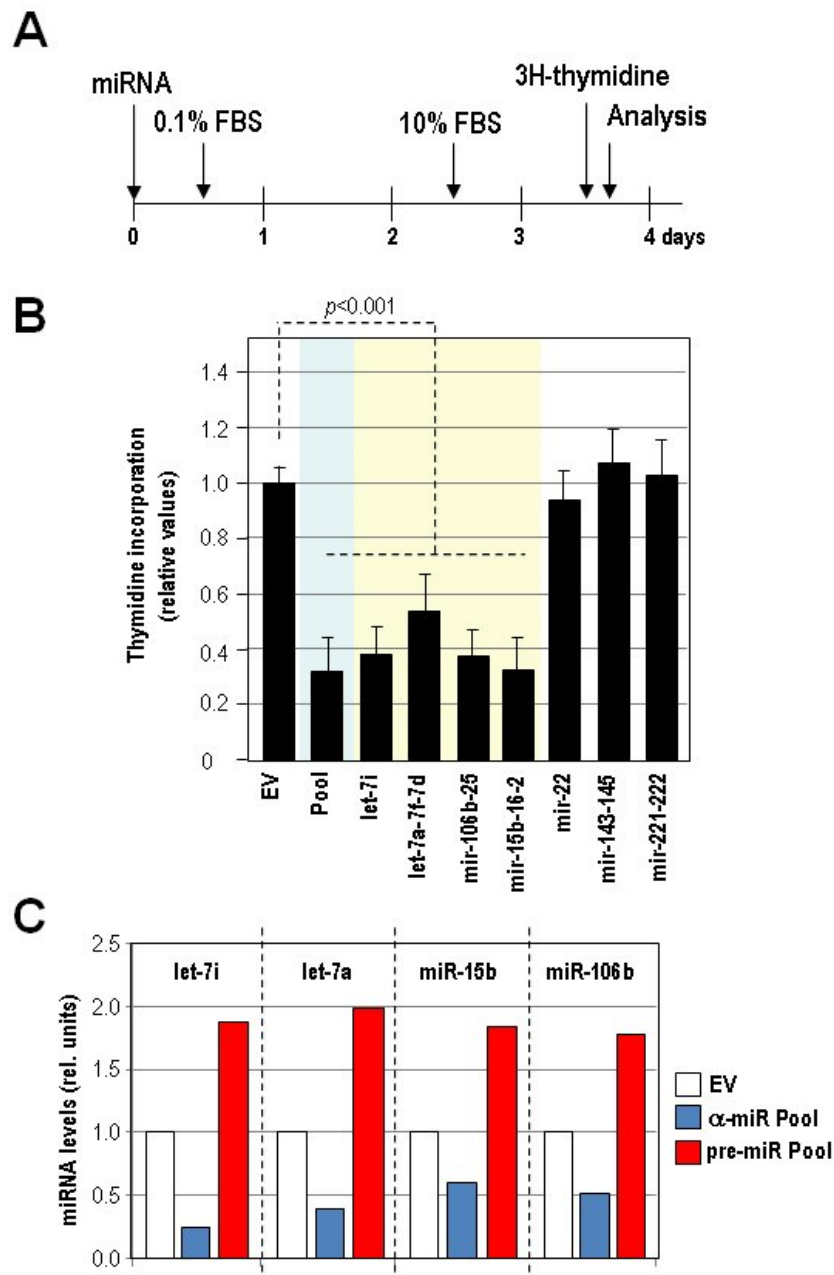

**Supplementary Figure 3. A**, Schematic representation of the protocol followed to test the effect of microRNAs during cell cycle entry. Different miRNA clusters or anti-miRNA oligonucleotides were transfected in MEFs and cells were arrested for 48 h without serum. Cells were harvested 18 h after serum stimulation in the presence of tritiated thymidine. **B**, Representative values to thymidine incorporation after expression of individual miRNA clusters or a pool of the clusters that scored positive for direct interaction with E2F (Fig. 4). All E2F-induced miRNA clusters displayed a significant inhibition of DNA replication in this assay. Other clusters that did not show interaction with E2F (*mir-22*, *mir-143-145* and *mir-221-222*) were used as a control. **C**, Real-time PCR of miRNA levels MEFs transfected with the empty vector (EV, white columns), the pool of E2F-induced miRNAs (pre-miR Pool in pMirVec plasmids; red), and the pool of inhibitors against these miRNAs ( $\alpha$ -miR Pool; blue). A member of each of the E2F-induced clusters was analyzed. Data were normalized versus the levels of Sno202 in each condition and are represented as relative increase or decrease versus cells transfected with the EV.

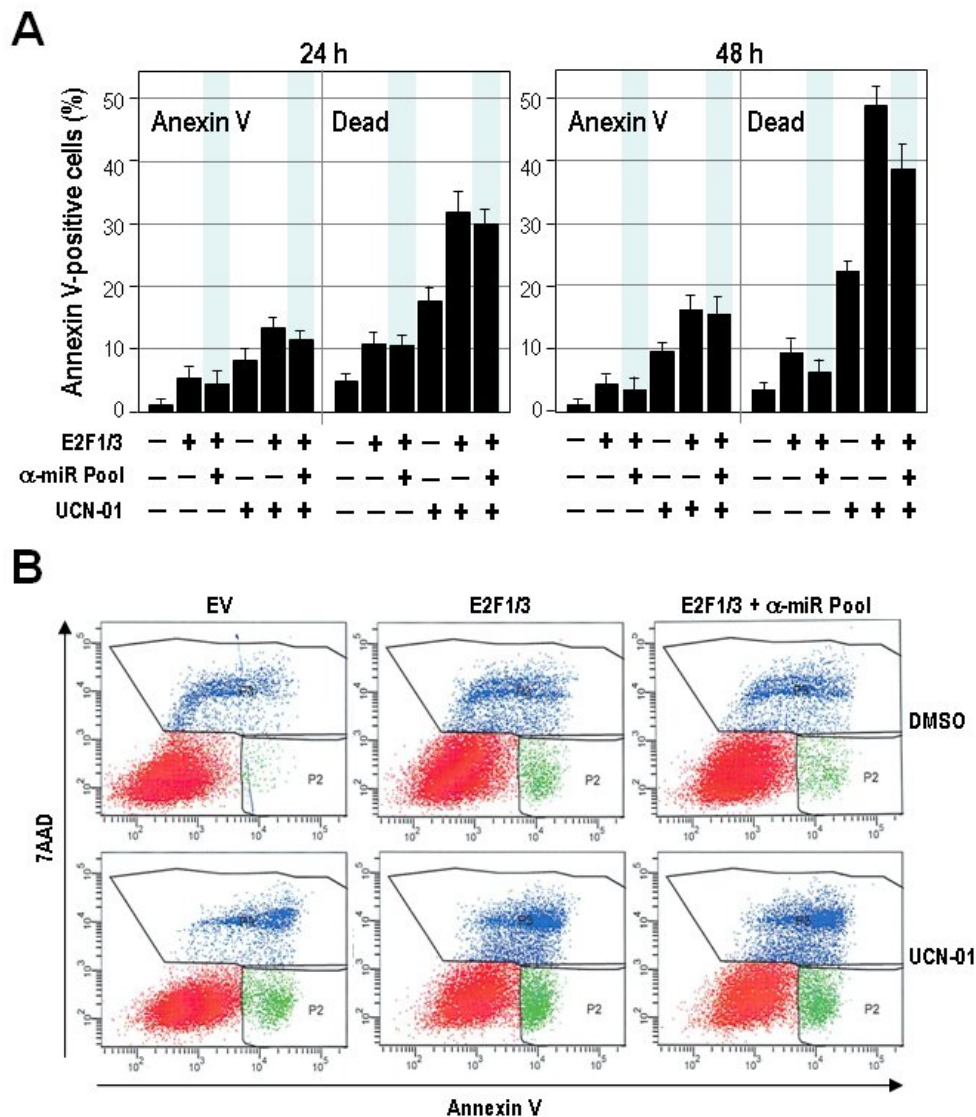

**Supplementary Figure 4.** MEFs were transfected with vectors expressing E2F1 and E2F3 and/or anti-miR oligonucleotides against all E2F-induced miRNAs ( $\alpha$ -miR Pool) as indicated and analyzed 24 or 48 h after transfection. These cells were also treated with 300 nM of 7-Hydroxystaurosporine (UCN-01; Sigma) just after transfection. Annexin V was detected as suggested by manufacturer's (BD Pharmingen) and dead cells with 7-Amino-actinomycin D (7-AAD) by flow cytometry. The "-" symbols indicate empty vector, scramble oligonucleotides or the absence of UCN-01. **A**, Summary of Annexin V- or 7AAD (Dead)-positive cells in the presence or absence of the indicated reagents, and **B**, representative plots of 7AAD and Annexin V, indicating that the  $\alpha$ -miR pool partially protects from apoptosis induced by E2F1/3 and UCN-01.

**Supplementary Table 1.** Gene Ontology pathways enriched in the predicted targets of E2F-induced miRNAs.

| Cellular process<br>(Adjusted <i>P</i> -value)     | miRNA targets                                                                                                                                                                                                                                                                                                                                                                                                                                                                                                                                                                                                                                                                                                                                                                                                                                                                                                                                                                                                                                                                                                                                                                                                                                                                                                                                                                                                                                                                                                                                                                                                                                                                                                                                                                                                                                                                                                                                                                                                                                                                                                                                                                                                                                                             |
|----------------------------------------------------|---------------------------------------------------------------------------------------------------------------------------------------------------------------------------------------------------------------------------------------------------------------------------------------------------------------------------------------------------------------------------------------------------------------------------------------------------------------------------------------------------------------------------------------------------------------------------------------------------------------------------------------------------------------------------------------------------------------------------------------------------------------------------------------------------------------------------------------------------------------------------------------------------------------------------------------------------------------------------------------------------------------------------------------------------------------------------------------------------------------------------------------------------------------------------------------------------------------------------------------------------------------------------------------------------------------------------------------------------------------------------------------------------------------------------------------------------------------------------------------------------------------------------------------------------------------------------------------------------------------------------------------------------------------------------------------------------------------------------------------------------------------------------------------------------------------------------------------------------------------------------------------------------------------------------------------------------------------------------------------------------------------------------------------------------------------------------------------------------------------------------------------------------------------------------------------------------------------------------------------------------------------------------|
| Multicellular organismal development<br>(4.97E-05) | Aatf, Actc1, Acvr2a, Adm, Adrb2, Ahctf1, Akt1, Aldh5a1, Alg5, Alx4, Anpep, Apbb2, App, Aqp11, Asl, Atm, Atp7a, Bad, Bbs2, Bicc1, Birc5, Bzw2, Casp3, Cd40, Cdkn1c, Cga, Chd8, Chrd, Chrna3, Col13a1, Crb3, Cryaa, Ctf2, Cxcl13, Cyt11, Dab1, Dad1, Dcl1, Dkk4, Dlk1, Dll1, Dll4, Drd3, Dvl1, E2f1, E2f5, Eda, Egfl8, Egr3, Elf5, Emx1, Epha7, Ercc2, Fam48a, Fas, Fasl, Fgf8, Fhl2, Foxa2, Foxg1, Foxh1, Foxq1, Fzd3, Gab3, Gabrr2, Gal, Gap43, Gdf11, Gjb3, Gla, Gmnn, Grhl1, Hand1, Hand2, Hmx3, Hoxc9, Hoxd10, Hnr, Hsd11b1, Hsd17b4, Ibsp, Ick, Il25, Il6, Iqcb1, Irx5, Ivl, Kif3a, Lama3, Lgals1, Lhx8, Lmo2, Lrp6, Man2a1, Map2k1, Map2k5, Map3k1, Map3k7ip1, Mapk7, Mesdc2, Mgp, Mlf1, Mmp19, Mmp2, Msh2, Myb, Myc, Mycn, Myh9, Myt11, Nbn, Ncapg2, Ncor2, Ndn, Neurog3, Nf2, Ngf, Nkd1, Nkx2-4, Nos2, Npnt, Nr0b1, Nr4a3, Nrtn, Ntf3, Ntn1, Ntn4, Numb, Numbl, Olfm1, Pax4, Pde3b, Pgf, Pip5k1c, Pkd1, Plac1, Plekha1, Plxna2, Plxnd1, Pnpla6, Prr15, Prtg, Rarb, Reln, Rnf6, Rogdi, Rora, Rspo3, Rtnn, Sall4, Sema3f, Sema4c, Shank3, Slc18a2, Slit1, Smad7, Sor11, Syvn1, Tacc2, Tbx5, Tcf21, Tdrd1, Tgif1, Tgm1, Th, Tnc, Tnni1, Trp53, Tssk2, Tll7, Uchl1, Ugdh, Ung, Ush1c, Vangl1, Vegfa, Vezt, Wnt5b, Wnt8a, Xdh, Xrcc6, Zfp830                                                                                                                                                                                                                                                                                                                                                                                                                                                                                                                                                                                                                                                                                                                                                                                                                                                                                                                                                                                                                            |
| Cell cycle<br>(5.13E-05)                           | 2610028A01Rik, 4632434111Rik, Aatf, Akap8, Anln, Apbb2, App, Arl2, Arl3, Atm, Avpi1, B230120H23Rik, Bin3, Birc5, Bub3, Casp3, Ccnd1, Ccnd2, Ccne1, Ccnt1, Cdc25a, Cdk7, Cdkn1c, Cep55, Cgref1, Cryaa, Dsn1, E2f1, E2f5, Esp1, Fbxo5, Fgf8, Foxg1, Fsd1, G0s2, Gas2l2, Gmnn, Haus1, Herc2, Hmg20b, Kif2b, Lgl2, Mapk7, Mcm3, Mcm7, Mlf1, Msh2, Myb, Myh9, Nbn, Ncapg2, Ncaph, Nek3, Nf2, Npat, Pcnt, Pelo, Pkd1, Plekho1, Ppp1cb, Ppp6c, Psmc3ip, Rad21, Rad51, Rad9, Rbl1, Rcc2, Rec8, Sesn1, Sesn3, Sirt2, Stk11, Tacc2, Taf1, Tdrd1, Trip13, Trp53, Tsg101, Tspyl2, Tubb5, Uhrf2, Wee1, Xrn1, Zc3hc1, Zfp830                                                                                                                                                                                                                                                                                                                                                                                                                                                                                                                                                                                                                                                                                                                                                                                                                                                                                                                                                                                                                                                                                                                                                                                                                                                                                                                                                                                                                                                                                                                                                                                                                                                            |
| Cellular metabolic process<br>(8.02E-05)           | 1190003J15Rik, 2210018M11Rik, 2310003H01Rik, 2610028A01Rik, 2610209A20Rik, 2810006K23Rik, Aatf, Acaa2, Acad8, Aco2, Actl6a, Acvr2a, Adh5, Adora2b, Adrb2, Adrb3, Agk, Ahctf1, Ak7, Akt1, Akt3, Aktip, Aldh5a1, Aldh8a1, Alox5, Alx4, Apbb2, App, Araf, Arg2, Arv1, Asb3, Asb8, Ascc1, Asl, Atf7ip2, Atm, Atn1, Atp13a2, Atp2c1, Atp6v0a4, Atp7a, Avpi1, B230120H23Rik, BC057552, Bach2, Bad, Bcat2, Bckdk, Bmx, Camkk2, Camta1, Capza2, Capza3, Car6, Card10, Casp3, Cc2d1a, Ccne1, Ccno, Ccnt1, Ccs, Cct5, Cd40, Cdc25a, Cdk7, Cdk11, Cdkn1c, Cdo1, Cga, Chd4, Chd8, Chrna3, Chst14, Cited4, Ckmt2, Clk3, Clp1, Cmas, Cnot1, Cnot4, Colq, Cops2, Cpeb2, Cpsf1, Crot, Cstf3, Cul2, Cyld, Cyp2f2, Cyt11, Dab1, Dapk2, Dbt, Dcl1, Dct, Ddost, Ddx20, Ddx39, Dhikd1, Dnahc12, Dnajc4, Dnajc5b, Dnmt1, Drd3, Dus2l, Dusp28, Dyrk4, E2f1, E2f5, Echs1, Eef1b2, Efcab6, Egr3, Eif2b2, Eif2b5, Eif2c1, Eif4g2, Elac1, Elf5, Elovl7, Eme1, Emx1, Enox1, Enpp7, Entpd2, Epha1, Epha7, Ephb4, Epx, Ercc2, Ercc8, Esrp1, Ewsr1, Exosc4, Far1, Fbxl4, Fbxl5, Fbxo10, Fbxo2, Fbxo31, Fbxo5, Fbxw5, Fgd4, Fhl2, Fkrp, Fnta, Foxa2, Foxg1, Foxh1, Foxq1, Frrs1, Gale, Galk1, Galnt1, Gan, Gata1, Gatm, Gck, Gfpt1, Ggcx, Ggt1, Gipc1, Gla, Gmnn, Grhl1, Gspt1, Gtf2b, Gtf2i, Gtf3a, Gtf3c1, Hand1, Hand2, Hck, Hdac10, Herc2, Herpud2, Hif3a, Hivep1, Hmg20b, Hmox2, Hmx3, Hnf4g, Hnrnl, Hoxc9, Hoxd10, Hsd11b1, Hsd17b1, Hsd17b4, Iars, Ick, Idh2, Ifi30, Igf2bp3, Ikbkap, Ikbkg, Il6, Imp3, Ipo9, Iqwd1, Irak4, Irf2bp2, Irx5, Isca2, Itih5, Klhl31, Lalba, Lbxcor1, Lhx8, Limk2, Lipe, Lpcat2, Maf1, Man2a1, Man2c1, Map2k1, Map2k2, Map2k5, Map3k1, Map3k2, Map3k7ip1, Map3k9, Map4k3, Mapk7, Mapk9, Mapkbp1, March8, Mark4, Mast2, Mast4, Mastl, Mbtps1, Mcm3, Mcm7, Me3, Med10, Med26, Mgst1, Mid1, Mif4gd, Mlf1, Mpg, Mrpl13, Mrpl21, Mrpl36, Mrpl48, Mrpl51, Mrps18a, Mrps18c, Mrps6, Msh2, Mst1r, Mtap, Mtif2, Mtif3, Mtm1, Mtmr7, Mxd3, Myb, Myc, Mycn, Mylk4, Myt11, Naalad2, Nars2, Nbn, Ncoa3, Ncor2, Ndn, Ndst2, Nek3, Neurog3, Nf2, Nfat5, Nkx2-4, Nme4, Nme6, Nos2, Nosip, Npas3, Npat, Npr2, Nr0b1, Nr4a3, Nrbp1, Nrf1, Ntf3, Oaz3, Orc1l, Orc6l, Osbp15, Osbp19, Otud7a, Oxct1, P2rx4, Paf1, Papola, Papolg, Pax4, Pcbd1, Pcyt2, Pcd11, Pdgfd, Pelo, Peo1, Pkfb1, Pfl, |

Pfkip, Pgm2, Phf5a, Phkb, Phf1, Pigq, Pip4k2c, Pip5k1c, Pla2g2a, Pmm1, Pnpla6, Poli, Polk, Polq, Polr2d, Polr3d, Polr3g, Pou6f1, Ppap2a, Ppif, Ppil3, Ppp1cb, Ppp6c, Prim1, Prkcsh, Prodh, Prpf8, Psat1, Psmc3ip, Pth, Ptk6, Ptpru, Ptrh2, Qars, Qrs1, Rad21, Rad51, Rad9, Rad9b, Rapgef4, Rarb, Rbbp7, Rbl1, Rdx, Reln, Rest, Rev3l, Rfx5, Rfx6, Rgr, Riok3, Rln3, Rnf125, Rnf20, Rnf4, Rnf5, Rnf6, Rora, Rpa2, Rpn2, Rpp25, Rpusd1, Rpusd2, Rpusd3, Rrm2, Rtc1, Rtel1, Safb2, Sall4, Sbn2, Scyl1, Sds, Sertad3, Sfpq, Sfrs16, Sirt2, Sirt3, Sirt7, Skp1a, Smad6, Smad7, Smox, Smpd1, Snai3, Snapc1, Soat2, Socs6, Sorl1, Speg, Srp14, Ssh1, Ssh2, Ssrp1, Stard3, Stk11, Stk31, Stub1, Styk1, Synj1, Syvn1, Tada1l, Taf1, Taf12, Tarbp2, Tbp, Tbp1, Tbx10, Tbx5, Tcf21, Tcf25, Tcfcp2, Tcp1, Tdo2, Tex14, Tgds, Tgif1, Tgm1, Th, Thnsl2, Tle2, Tle4, Tlr1, Tm7sf2, Tnks2, Tnni3k, Tnrc6c, Trim33, Trip13, Trmu, Trp53, Tsg101, Tspyl2, Tssk2, Tsta3, Tll4, Tll7, Tyk2, Ube2m, Ubl3, Uchl1, Ucn3, Uhm1, Uhrf2, Ung, Uqcrfs1, Uros, Usp18, Usp25, Usp3, Usp32, Usp37, Vars2, Vps36, Vrk3, Wbp4, Wee1, Wrnip1, Xrcc6, Xrn1, Yod1, Zc3hc1, Zcchc11, Zfp287, Zfp395, Zfp509, Zfp553, Zfp583, Zfp592, Zfp677, Zmym2, Zscan12, Zyg11a

---

**Supplementary Table 2.** Enrichment in transcription factors putatively regulating E2F-induced targets.

| Transcription Factor<br>(Adjusted <i>P</i> -value) | miRNA targets                                                                                                                                                                                                                                                                                                                                                                                                                                                                                                                                                                                                                                                                                                                                                                                                                                                                                                                                                                                                                                                                                                                                                                                                                                                                                                                                                                                                                                                                                                                                                                                                                                                                                                                                                                                                                                                                                                                                                                                                                                                                                                                                                                                                                                                                                                                                                                                                                                                                                                                                                                                                                                                           |
|----------------------------------------------------|-------------------------------------------------------------------------------------------------------------------------------------------------------------------------------------------------------------------------------------------------------------------------------------------------------------------------------------------------------------------------------------------------------------------------------------------------------------------------------------------------------------------------------------------------------------------------------------------------------------------------------------------------------------------------------------------------------------------------------------------------------------------------------------------------------------------------------------------------------------------------------------------------------------------------------------------------------------------------------------------------------------------------------------------------------------------------------------------------------------------------------------------------------------------------------------------------------------------------------------------------------------------------------------------------------------------------------------------------------------------------------------------------------------------------------------------------------------------------------------------------------------------------------------------------------------------------------------------------------------------------------------------------------------------------------------------------------------------------------------------------------------------------------------------------------------------------------------------------------------------------------------------------------------------------------------------------------------------------------------------------------------------------------------------------------------------------------------------------------------------------------------------------------------------------------------------------------------------------------------------------------------------------------------------------------------------------------------------------------------------------------------------------------------------------------------------------------------------------------------------------------------------------------------------------------------------------------------------------------------------------------------------------------------------------|
| KROX<br>(3.60E-08)                                 | 1700017B05Rik, 1700052N19Rik, 1810013L24Rik, 3110004L20Rik, 3110006E14Rik, 3200002M19Rik, 3300001P08Rik, 5730405I09Rik, 8430427H17Rik, 9630046K23Rik, Abcg1, Abcg4, Acvr2a, Add1, Asxl3, Atp11c, AW548124, AW549877, Axin2, Baiap2, BC025575, Bcl11b, Bcl2l11, Bcl6, Bcd2, Bmpr2, Bnip2, Braf, Btbd14a, Bzw2, C77080, Cacna1e, Camk2n1, Camk2n2, Cand1, Capn6, Cbx6, Ccnd1, Ccnd2, Ccnt2, Cdh24, Cdk5r1, Cic, Col12a1, Col27a1, Cpd, Cpm, Cyp46a1, Chd6, Chic1, D15Erd621e, Dll1, Dnajb5, Dnajc1, Dock3, Dpp10, Dpysl5, Dst, Dtx2, Dusp16, Dusp2, Dusp4, Dynl13, E2f1, E2f7, Egl2, Egr2, Eif2c4, Elk3, Ephb2, Etnk2, Fbxo32, Fbxo33, Fchsd2, Fosl2, Fst, Fzd7, Ghr, Gnal, Gnaq, Golga7, Gpiap1, Gpx7, Hand2, Has3, Hectd2, Hic1, Hmga1, Hnrpa2b1, Hs2st1, Il25, Irf2bp2, Jazf1, Kcna1, Kif1b, Klf2, Kremen1, Lamc1, Lbxcor1, Lonrf3, Lrig1, Man2a1, Map3k2, Map4k4, Mapk3, Marcks, Mesdc1, Metap1, Mgl1, Nat8l, Nek9, Nfatc3, Nfic, Nfic, Nlk, Nptxr, Nsd1, Ntn1, Onecut2, Ormdl3, Pappa, Pcaf, Pde10a, Pgm2l1, Phf19, Phr1, Pik3r1, Pitpnm3, Pknox1, Pld3, Pld5, Plekhg6, Plekho1, Plxnd1, Pols, Pou6f1, Ppapdc2, Ppargc1b, Ppp2r5c, Pten, Ptpn21, Qk, Ralb, Rap2c, Rbbp7, Rbpm2, Rev3l, Rgs9bp, Rhoc, Rnf24, Rufy3, Rybp, Samd8, Sec14l1, Sema3a, Sema4c, Sema4g, Sh3gl2, Skil, Slc12a7, Slc24a3, Slc25a22, Slc30a1, Sli1rk4, Smad5, Smad7, Socs7, Sox13, Stk40, Styx, Syt1, Tacc2, Tacc2, Tfip11, Tle4, Tmem168, Traf3, Trak2, Trhde, Uhrf2, Usp12, Usp21, Wnt3a, Wnt7a, Xkr8, Yod1, Ypel1, Ypel2, Zbtb39, Zdhc5, Zfhx4, Zswim4, Zswim5                                                                                                                                                                                                                                                                                                                                                                                                                                                                                                                                                                                                                                                                                                                                                                                                                                                                                                                                                                                                                                                                                                                              |
| E2F<br>(5.29E-05)                                  | 0610038F07Rik, 1110007L15Rik, 1110012D08Rik, 1500004A08Rik, 1700025G04Rik, 1700052N19Rik, 1810013C15Rik, 1810046J19Rik, 2010002N04Rik, 2210412D01Rik, 2310045A20Rik, 2410042D21Rik, 2700081O15Rik, 2810002I04Rik, 2810459M11Rik, 2900009I07Rik, 3110048E14Rik, 3732413I11Rik, 3930401K13Rik, 4921506J03Rik, 4931428F04Rik, 4933439F18Rik, 5031439G07Rik, 5730470L24Rik, 5730596K20Rik, 6030408C04Rik, 6430527G18Rik, A230106M20Rik, Aars, AB112350, Abcg1, Acsl4, Adam9, Adams15, Add3, Adm, A1848100, Akap8, Als2cr13, Angptl2, Ankib1, Ankrd15, Ankrd17, Ankrd52, Ankrd56, Apbb2, Aprin, Arhgap20, Arhgap26, Arid3a, Arid3b, Arl4c, Arpp19, Arrdc4, Asah3l, Asxl3, Atbf1, Atg16l1, Atg7, Atp6v1a, Atp7a, Atrnl1, B230219D22Rik, Bach1, Bag5, Bahd1, Bai2, Bambi, BC013529, BC022623, BC024868, BC025575, BC037034, BC057552, Bcat2, Bcl11b, Bcl2l11, Bcd2, Bmp2, Brms1l, Btbd10, Btg2, Btrc, C230078M08Rik, C330007P06Rik, C80913, Cab39, Calm1, Calm2, Calm3, Camk2n2, Cap1, Cask, Casp3, Casr, Cbfa2t3h, Cbln4, Cbx2, Cbx4, Cbx5, Cbx6, Cc2d1b, Ccdc128, Ccnd2, Ccnd3, Ccne1, Ccne2, Ccnj, Ccr10, Cdc25a, Cdh22, Cdk5r1, Cdkn1a, Cdkn1c, Cdyl, Cep57, Cic, Cks1b, Clspn, Cntnap1, Col27a1, Col9a3, Corin, Cpd, Creb3l2, Creb5, Cry2, Csnk2a1, Ctdspl2, Cxcl10, Cyp26b1, Chd9, Chka, Chmp7, Chrd, D14Erd436e, D230025D16Rik, D3Ucla1, D7Wsu128e, Dab1, Dach1, Dazap2, Dcp2, Dcun1d4, Dhdh1, Ddit4l, Ddx19b, Ddx3y, Ddx5, Derl2, Dlc1, Dlgh3, Dist, Dll1, Dll4, Dmrta2, Dmxl2, Dnaja2, Dnaja4, Dnajb9, Dnajc16, Dock3, Dock4, Dpf2, Dpm1, Dpp6, Dpysl2, Dst, Dusp1, Dusp4, Dusp7, Dusp9, Dyrk1b, E130014J05Rik, E2f2, E2f7, E430028B21Rik, Edem1, Efnb1, EG215714, Egl2, Eif1, Eif4b, Elk4, Ell, En2, Enc1, Ensa, Eomes, Ep300, Epas1, Epb4, Epb4.1, Epb4.9, Epha4, Erc1, Esrrg, Etnk1, Etnk1, Ets1, Exoc5, F3, Faim, Fastk, Fat4, Fbxl20, Fbxl3, Fbxo21, Fbxo28, Fbxo30, Fbxo33, Fgf5, Fjx1, Fkbp1a, Fkbp5, Fkrp, Fmn1, Fmnl3, Fmr1, Fnbp4, Fndc8, Fosl1, Fosl2, Foxb1, Fras1, Frmd5, Frmd6, Frs2, Fxr1h, Fzd7, G0s2, G3bp2, Gabpb1, Gabra6, Gabrb2, Gad2, Gata2, Gata6, Gcat, Gdf6, Gdnf, Gdpc1, Gfpt2, Gga3, Ggnbp1, Glud1, Gnai3, Gnaq, Gorasp2, Gosr1, Gpatch3, Gppb1l1, Gpr137b, Gpr173, Gpr180, Grif1, Gse1, Gsk3b, Has2, Hdgf, Hd1bp, Hivep1, Hmx3, Hnrpa1, Hnrpa2b1, Hnrpa3, Hook1, Hoxa3, Hoxb4, Hoxd1, Hrbl, Hs2st1, Igf2, Igf2bp3, Igsf4a, Il10, Il25, Impdh1, Ing3, Insr, Ints12, Ipo11, Irf2bp2, Irx2, Itga8, Itpr1, Jag1, Jak1, Kcna1, Kcnc1, Kcnh5, Kcnj2, Kcnq2, Khdrbs1, Kif1b, Kif21b, Kif5b, Klc4, Klf10, Klf9, Kpnb1, Letmd1, Limd1, Limk2, Lin52, Lmx1a, Loxl3, Lphn1, Lrba, Lrch1, Lrig1, Lrig2, Lrig3, Macf1, Man2a1, Map2k1, Map3k2, Map3k5, |

Map3k7ip2, Map3k7ip3, Mapk4, Mapre1, Marcks, March8, Mast3, Mast4, Mbtps2, Mea1, Mfap3l, Mknk2, Mllt10, Mllt6, Morc3, Mpdz, Mrg1, Mrpl51, Msi2, Mtpn, Myb, Mycn, Myo18a, Myo1b, Myo1c, Myo1d, Myrip, Nanos1, Nbl1, Ndst2, Necap1, Nefm, Nek9, Neo1, Neurod1, Neurod5, Nf2, Nfatc3, Nfia, Nid2, Nkx2-2, Nkx2-3, Nox4, Np1xr, Nr2e3, Nr2f2, Nrp2, Nsd1, Nup50, Nxt2, Obfc2a, Odz2, Ogt, Onecut3, Ostm1, Otud7b, Otx1, Pafah1b1, Papd5, Pappa, Pard3b, Pcmt1, Pdap1, Pdcad4, Pdgfb, Pdia6, Pdpk1, Peg10, Peli3, Perq1, Pgam1, Phf19, Phf6, Phr1, Phyhipl, Pik3r1, Pim1, Pitpnm2, Pitr1, Pkd1, Pkd2, Plekhc1, Plekhh1, Pols, Ppara, Ppfia2, Ppm1d, Ppp1r3e, Ppp2r1a, Pptc7, Prdm6, Prpf38b, Prr15, Prrx1, Psd, Psd3, Pskh1, Psme3, Ptgfrn, Pvr1l, Pygo2, Rab4b, Rab9b, Rad51l3, Rap1b, Rasef, Rasl11b, Rasl12, Rb1cc1, Rbbp7, Rbm38, Rdh10, Rdx, Reln, Rev3l, Rgma, Rkhd1, Rnf128, Rnf44, Rock2, Rpa2, Rps6ka5, Rqcd1, Rreb1, Rrm2, Sash1, Satb2, Scml2, Scn8a, Scoc, Senp5, Serbp1, Sfrs11, Sgpp1, Sh2b3, Shf, Siah1a, Siah1b, Sim1, Ski, Slc10a7, Slc12a9, Slc16a12, Slc16a6, Slc25a27, Slc25a32, Slc25a4, Slc2a3, Slc2a4, Slc30a1, Slc35c1, Slc35d2, Slc41a2, Slc6a4, Slc6a5, Slc8a2, Slc9a1, Slco5a1, Slitrk4, Smad6, Smad7, Smoc2, Snap23, Snf1lk2, Sntb2, Snx8, Sorl1, Sox13, Spfh2, Spin1, Spnb4, Spred3, Sqstm1, Srebf2, Srpk2, Srrp, Ssx2ip, St6galnac6, St8sia1, Stk38, Surf4, Suz12, Syde1, Sypl, Syt11, Taf5, Taf9b, Tanc1, Tarbp2, Tbl1xr1, Tbx21, Tbx3, Tceb3, Tcf4, Tcfap4, Tcfcp2, Tcta, Tera, Tfrc, Tgfr1, Tgif, Thbs1, Thex1, Tia1, Tmcc1, Tmem127, Tmem23, Tmem32, Tmem55b, Tnks2, Tnrc6a, Tob2, Topors, Tpp1, Tram1, Trhde, Trib2, Trip11, Trove2, Trpc7, Tsc1, Tsg101, Tspyl2, Ttc14, Ttc9, Tusc2, Ubap1, Ubn1, Ubr1, Uevld, Ugcg, Uhrf2, Usp21, Usp25, Usp46, Usp49, Vamp8, Vash2, Vat1, Vegfa, Vezf1, Vps26b, Vti1b, Wdr22, Wdr43, Wee1, Wipi2, Wnk1, Wwp2, Zbtb40, Zbtb5, Zcchc14, Zcchc2, Zfp287, Zfp318, Zfp365, Zfp367, Zfp46, Zfp622, Zfp661, Zfp91, Zfyve26, Zhx1, Zhx2, Zmym2

MAZ

(3.19E-04)

0610013E23Rik, 0610038F07Rik, 1110012D08Rik, 1110018G07Rik, 1110029E03Rik, 1200015N20Rik, 1300010M03Rik, 1300010M03Rik, 1500001A10Rik, 1500003O03Rik, 1500004A08Rik, 1700012H17Rik, 1700017B05Rik, 1700025G04Rik, 1700105P06Rik, 1810013C15Rik, 1810013L24Rik, 1810031K17Rik, 1810055E12Rik, 2010008E23Rik, 2200002K05Rik, 2310028N02Rik, 2310040C09Rik, 2310047M10Rik, 2400003C14Rik, 2410127E16Rik, 2410166I05Rik, 2510009E07Rik, 2700078E11Rik, 2700081O15Rik, 2810002I04Rik, 2810030E01Rik, 2810407C02Rik, 2810457I06Rik, 2900009I07Rik, 2900041A09Rik, 3110003A22Rik, 3110004L20Rik, 3110006E14Rik, 3110006E14Rik, 3732413I11Rik, 3930401K13Rik, 3930401K13Rik, 4631427C17Rik, 4632419I22Rik, 4732495E13Rik, 4921505C17Rik, 4921506J03Rik, 4921523A10Rik, 4921523A10Rik, 4933411K20Rik, 4933426M11Rik, 5031439G07Rik, 5330439J01Rik, 5730405I09Rik, 5730406M06Rik, 5730406M06Rik, 5830411G16Rik, 5830411G16Rik, 5830434P21Rik, 5830472M02Rik, 5830472M02Rik, 5930434B04Rik, 6030408C04Rik, 6030465E24Rik, 6430527G18Rik, 6430550H21Rik, 6720456B07Rik, 9130023D20Rik, 9130404D14Rik, 9430067K14Rik, 9530066K23Rik, 9630046K23Rik, 9930012K11Rik, A230106M20Rik, AA536743, Aak1, Aak1, Aars, AB112350, Abca1, Abcb9, Abcg1, Abcg4, Abhd5, Abi1, Abl2, Acbd3, Acot11, Acsl1, Acsl4, Acsl6, Acta1, Actr1a, Acvr1b, Adam10, Adam19, Adam23, Adamts15, Adamts18, Adamts5, Adamts8, Adarb1, Adcy2, Adcy5, Add3, Adipor2, Adm, Adra2a, Adrb1, Aff4, Ahcf1, AI450540, AI846148, AI848100, Akap11, Akap6, Akap7, Akap8, Aktip, Aldh6a1, Alg13, Alkbh5, Als2cr2, Alx4, Amigo3, Ankib1, Ankrd15, Ankrd17, Ankrd28, Ankrd49, Ankrd52, Ankrd56, Ankrd9, Anks1, Ap1s1, Apbb2, Apccd1, Apln, Aplp2, App, Arf14, Arhgap12, Arhgap20, Arhgap26, Arhgap28, Arhgef10, Arhgef11, Arhgef15, Arhgef7, Arhgef9, Arid3a, Arid3b, Arid5b, Arl4c, Arl4d, Armc8, Armcx2, Arpp19, Arpp21, Arrdc4, Asf1a, Asxl3, Atg16l1, Atp11c, Atp1b4, Atp2a2, Atp2b2, Atp6v1a, Atp8b1, Atrnl1, Atrx, Atxn1, Atxn3, AU042671, AU042671, AW548124, Axin2, Azin1, B230219D22Rik, B4galt1, B930006L02Rik, Bach1, Bach2, Bahcc1, Bahd1, Bai2, Baiap2, Baz2a, Baz2b, BC004022, BC004044, BC013481, BC013529, BC018242, BC022623, BC024868, BC025575, BC030046, BC049806, BC057552, BC060632, BC068110, Bcat2, Bcl11b, Bcl2, Bcl2l11, Bcl2l2, Bcl6, Bcl7a, Bdnf, Birc2, Bin3, Birc4, Bkl, BM948371, BM948371, Bmpr1a, Bmpr2, Bnip3l, Braf, Brd3, Brms1l, Bsdcl1, Bsn, Btbd14a, Btbd3, Btg2, Btg3, C030014K22Rik, C130032J12Rik, C1ql3, C330007P06Rik, C330021A05Rik, C530008M17Rik, C630007B19Rik, C77080, Calm1, Calm2, Calm3, Camk2n1, Camk2n2, Camsap1, Camta2, Cand1, Cap1, Capn6, Capza2, Card10, Casc4, Cask, Caskin1, Casp3, Casr, Cbara1, Cbfa2t3h, Cbx2, Cbx4, Cbx5, Cbx6, Cc2d1a, Ccdc100, Ccdc128, Ccnd1, Ccnd2, Ccne2, Ccng1, Ccng2, Ccnj, Ccnl2, Ccnt2, Ccr10,



Cd209e, Cd28, Cd2ap, Cd69, Cd9, Cdc25a, Cdc42ep2, Cdca4, Cdh22, Cdh24, Cdk8, Cdkn1a, Cdkn1c, Cdv3, Cdyl, Celsr2, Centg2, Cf12, Cggbp1, Cgn11, Cic, Cks1b, Clk3, Clock, Cmpk, Cnih2, Cnksr2, Cnn1, Cnot2, Cnot4, Cnot7, Cnr1, Cntnap1, Col12a1, Col15a1, Col19a1, Col1a2, Col27a1, Col4a1, Col4a2, Col4a4, Col5a2, Cops7b, Corin, Coro2b, Cpa4, Cpeb3, Cpm, Creb1, Creb3l2, Creb5, Crip3, Crk, Crkl, Crsp7, Csf1, Ctdspl, Ctns, Ctsa, Cyb5d1, Cyp26b1, Chd4, Chd6, Chd9, Chic1, Chka, Chrd, Chuk, D030011010Rik, D11Wsu99e, D130059P03Rik, D1Ertdd622e, D230004J03Rik, D330017J20Rik, D3Bwg0562e, D4Wsu53e, D5Ertdd40e, Dab1, Dab2, Dach1, Dazap2, Dbn1, Dcamk1l, Dcbl1, Dcp2, Dctn4, Dcun1d2, Dcun1d4, Dcx, Ddef1, Ddn, Ddost, Ddx19b, Ddx26b, Ddx5, Dennd4b, Dhdds, Diap1, Dirc2, Dixdc1, Dkk3, Dlc1, Dlgap4, Dlst, Dll1, Dll4, Dmp1, Dmrta2, Dmxl2, Dnaja4, Dnajb5, Dnajb9, Dnajc16, Dnase1l2, Dnm2, Dnmt3b, Dock3, Dot1l, Dpp10, Dpp3, Drctnbn1a, Drd1a, Dus2l, Dusp1, Dusp10, Dusp16, Dusp2, Dusp4, Dusp7, Dusp8, Dync1li2, Dynlt3, Dyrk1b, E030049G20Rik, E130309D14Rik, E130309F12Rik, E230022H04Rik, E2f2, E2f7, E430028B21Rik, Ebf3, Eda, Edem1, Edn1, Eea1, Efh2, Efnb1, Efnb2, Egln2, Egr2, Eif1, Eif3s1, Eif3s10, Eif4b, Eif4e2, Eif4h, Eif5b, Elavl2, Elk4, Elovl6, Ell, En2, Enah, Ensa, ENSMUSG00000049830, Entpd7, Eomes, Ep300, Epas1, Epb4, Epb4.1, Epha4, Ephb2, Ephb4, Ergic1, Ero1lb, Espl1, Esrra, Esrb, Etnk1, Etnk2, Ets1, Etv1, Etv3, Etv6, Evi5, Exoc5, Extl3, Ezh1, Ezh2, F3, Farp1, Fasl, Fastk, Fat4, Fbn1, Fbn2, Fbxl12, Fbxl14, Fbxl2, Fbxl20, Fbxo32, Fchsd1, Fchsd2, Fgd1, Fgd5, Fgf4, Fgf5, Fgf7, Fgfr1, Fign, Fjx1, Fkbp5, Fkrp, Fmn1, Fmr1, Fndc3b, Fosl2, Foxa1, Foxb1, Foxg1, Foxj2, Frap1, Fras1, Freq, Frmd4b, Frmd6, Frs2, Fst, Fstl1, Furin, Fusip1, Fxr1h, Fyn, Fzd7, G0s2, G3bp2, Gab1, Gabpb1, Gad2, Gale, Galnt2, Gap43, Gas7, Gata2, Gata6, Gatad2a, Gtm, Gbf1, Gbp6, Gca, Gcat, Gcnc3, Gda, Gdf11, Gdf8, Gdnf, Gfpl2, Gga2, Ggnbp1, Ghr, Glt8d3, Glud1, Gm1082, Gm1568, Gm22, Gm632, Gm672, Gm908, Gna13, Gnai3, Gnal, Gnaq, Gng5, Gns, Golga4, Golt1b, Gosr1, Gpatch3, Gpc6, Gpiap1, Gpr137, Gpr153, Gpr156, Gpr157, Gpr173, Gpr180, Gpr85, Gpx7, Gramd1b, Gramd1c, Greb1, Gria2, Gria3, Grid2ip, Grin2b, Grif1, Grm7, Gse1, Gsk3b, Gtdc1, Habp4, Hand1, Hand2, Has2, Has3, Hbp1, Hcn2, Hdgf, Hdgfrp3, Hdlbp, Hectd1, Helz, Herc2, Hiata1, Hic1, Hic2, Hif1a, Hif3a, Higd1a, Hipk1, Hivep1, Hlf, Hmbox1, Hmga2, Hmx3, Hnrpa1, Hnrpa2b1, Hnrpa3, Hook1, Hoxa3, Hoxb4, Hoxd1, Hr, Hrb, Hrbl, Hs2st1, Hs3st3a1, Hsd11b1, Hspb2, Hspg2, Htr2c, Igf1r, Igf2bp3, Igsf4a, Ikbke, Il10, Il10ra, Il13, Il6st, Impdh1, Ing3, Inoc1, Insr, Ints12, Ints2, Ipo11, Ipo9, Irs4, Irx2, Islr, Itfg1, Itga5, Itgav, Itpr1, Jag1, Jak1, Jarid2, Jazf1, Jmjd1a, Jmjd3, Jostd1, Jub, Kcna1, Kcnab1, Kcnb1, Kcnc1, Kcnc2, Kcnc4, Kcnc4, Kcne4, Kcnh5, Kcnk18, Kcnq2, Kctd4, Kctd8, Khdrbs1, Khsp, Kif13a, Kif21b, Kif26b, Kif5a, Klc2, Klf10, Klf12, Klf4, Klf6, Klf8, Klf9, Klhdc8b, Klhl20, Klhl23, Klhl28, Klhl29, Klhl6, Klk10, Kpna2, Kpna4, Kpnb1, Ky, Lalba, Lamc1, Lats2, Lbh, Lbxcor1, Lcor, Lcorl, Ldlrap1, Lhfpl2, Lhx6, Lhx9, Lif, Limd2, Limk1, Lin28, Lin52, Lmbr1l, Lmo2, Lmod1, Lnp, Loxl3, Loxl4, Lphn1, Lrba, Lrch1, Lrfn4, Lrig1, Lrig3, Lrrc20, Lrrc55, Lrrn3, Lrrn6a, Lsm11, Lsm14b, Lsm6, Luzp1, Lypd6, Lztr2, M6pr, Macf1, Macf1, Magi3, Man2a1, Map2k3, Map2k4, Map3k1, Map3k11, Map3k12, Map3k14, Map3k2, Map3k3, Map3k4, Map3k7ip3, Map4k4, Mapk3, Mapk4, Mapk6, Mapk9, Mapk9, Mapre1, Marcks, Marcks1, March9, Mast3, Mast3, Mat2a, Mbtd1, Mbtps1, Mcf2l, Mcl1, Mea1, Mecp2, Med6, Med8, Mesdc1, Mfn2, Mgat4a, Mgl1, Midn, Mier3, Mink1, Mknk1, Mknk2, Mllt10, Mllt6, Mmp24, Mnt, Morf411, Mov10, Mrg1, Mrg2, Mrpl51, Msi2, Msl2l1, Mtch2, Mtf1, Mtmr3, Mtpn, Myb, Mycl1, Mycn, Myo10, Myo1c, Myo1d, Myo5a, Nanos1, Nap1l1, Narg1, Nav1, Nckap1l, Ncoa2, Ndel1, Ndst2, Neb1, Nek3, Neo1, Neurod1, Neurod2, Neurod5, Neurog1, Neurog2, Neurog3, Nf1, Nf2, Nfatc2, Nfatc3, Nfe2l1, Nfia, Nfic, Nfic, Nfrkb, Ngly1, Nhlh1, Nisch, Nkd1, Nkx2-2, Nkx23, Nlk, Nme4, Nol4, Nope, Nova1, Npas3, Npepl1, Nphp3, Npnt, Npr2, Npnt, Nptx1, Nptxr, Nr2f2, Nr6a1, Nras, Nrf1, Nrtn, Nsd1, Nt5dc3, Ntn1, Nufip2, Numbl, Nup35, Nup50, Nxt2, Obfc2a, Ocl, Olfm3, Olfm3, Onecut2, Onecut3, Osbpl5, Osmr, Ostm1, OTTMUSG0000000934, Otud7b, Otx1, P140, P4ha2, Pak1, Pam, Pappa, Pax9, Pbx1, Pbx2, Pbx3, Pcaf, Pcbp4, Pcdh17, Pcdha1, Pcdha11, Pcdha12, Pcdha7, Pcdhac1, Pcdhac2, Pcgf3, Pcy11b, Pde10a, Pde1c, Pdgfb, Pdgfra, Pdik1l, Pdpk1, Pdxk, Peg10, Per2, Per3, Pex5, Phf1, Phf15, Phf19, Phf6, Phlda3, Phr1, Phyhip, Pi4k2b, Pi4k2b, Piga, Pik3cb, Pik3r1, Pik3r3, Pik4cb, Pim1, Pip5k2a, Pip5k3, Pisd, Pitpna, Pitpnc1, Pitpnm2, Pitpnm3, Ptx1, Pkd2, Pkia, Pknnox1, Pla2g3, Plagl2, Pld3, Plekha3, Plekha7, Plekhg6, Plekhh1, Plxna2, Plxnc1, Plxnd1, Pnkd, Pnkd, Pnpla6, Polr3d, Polr3e, Pols, Pom121, Pou4f2, Pou6f1, Ppara, Ppargc1b, Ppfia2, Ppm1a, Ppm1e, Ppm1g, Ppp1r13b, Ppp1r3b, Ppp1r3e, Ppp1r9a, Ppp1r9b, Ppp2ca, Ppp2r1a, Ppp2r1b, Ppp2r2a, Pqlc2, Prdm1, Prdm6, Prei3, Prei4, Prkar1a, Prkg1, Prpf38b, Prps2, Prr15, Prrx1, Prss22, Prtg, Pscd3, Pskh1,

Psme3, Ptbp1, Ptbp1, Ptger4, Ptgrn, Ptpn13, Ptpn21, Ptpnj, Ptprr, Punc, Pvr1, Pwpp2, Pygo2, Qars, Rab11b, Rab11fip2, Rab11fip4, Rab12, Rab14, Rab15, Rab22a, Rab23, Rab4b, Rab5a, Rab5b, Rab6b, Rab9b, Rabgap1, Rabgap1l, Rad23b, Rad51l3, Rai16, Ralb, Ranbp3, Rap1b, Rap2c, Rasef, Rasgef1a, Rasgrp1, Rasl11b, Rasl12, Rassf2, Rassf5, Rb1cc1, Rbl2, Rbm38, Rbpms2, Rbpsuh, Rcn1, Rdh10, Rdh13, Rdx, Reep3, Reln, Rem2, Repts2, Rerg, Ret, Rev3l, Rfx4, Rfx5, Rgma, Rgmb, Rgnf, Rgs17, Rgs8, Rgs9bp, Rhoc, Rkhd1, Rnf10, Rnf111, Rnf12, Rnf125, Rnf128, Rnf138, Rnf144, Rnf2, Rnf20, Rnf24, Rnf41, Rnf44, Rnf5, Rnf6, Rnf8, Robo1, Rock2, Rorc, Rpa2, Rps27a, Rps6ka1, Rras2, Rspo3, Rufy2, Runx1t1, Rybp, Sall4, Samd8, Saps3, Sash1, Satb2, Sbk1, Scamp2, Scd2, Scml2, Scn4b, Scn5a, Scn8a, Scoc, Scyl3, Sdc3, Sdk1, Sec14l1, Sec24a, Sema3a, Sema3f, Sema4b, Sema4c, Sema6a, Sema7a, Senp2, Senp5, Serf2, Sertad2, Sertad3, Sesn1, Sesn3, Setd3, Setd5, Sez6, Sf3b1, Sfxn1, Sfxn5, Sgk, Sgk3, Sgpp1, Sh2b3, Sh3kbp1, Shc4, Shf, Sim1, Six4, Skil, Slain2, Slamf6, Slc10a6, Slc10a7, Slc12a2, Slc12a5, Slc12a9, Slc16a6, Slc16a9, Slc17a6, Slc20a1, Slc20a2, Slc22a17, Slc24a2, Slc24a3, Slc25a24, Slc25a27, Slc25a36, Slc25a37, Slc25a4, Slc25a40, Slc25a42, Slc2a12, Slc2a3, Slc2a4, Slc30a1, Slc30a10, Slc30a4, Slc31a1, Slc35f3, Slc38a2, Slc41a1, Slc41a2, Slc4a4, Slc5a9, Slc6a15, Slc6a4, Slc6a5, Slc7a1, Slc7a11, Slc7a2, Slc7a2, Slc8a2, Slc9a1, Slco5a1, Slitrk6, Smad5, Smad6, Smad7, Smarcd1, Smarcd2, Smcr7l, Smoc1, Smurf1, Smyd5, Snf1l1, Snf1l2, Snn, Snph, Sntb2, Snurf, Snx30, Snx5, Socs1, Socs5, Socs6, Sorl1, Sos1, Sos2, Sox11, Sox13, Spag7, Spnb2, Spnb3, Spnb4, Spred3, Sprr2a, Spry4, Spryd4, Spsb4, Spty2d1, Sqstm1, Srebf2, Srgap3, Srr, Ssh3, St3gal1, St6gal1, St6galnac6, St8sia1, St8sia2, St8sia3, Stard13, Stat3, Stc1, Stim1, Stk38, Stk40, Ston2, Stox2, Strbp, Stx1a, Stx3, Sulf1, Sumf1, Suv39h2, Suv420h1, Syde2, Syncrip, Syne1, Synj1, Syt1, Syt11, Syt2, Syt3, Syt4, Sytl4, Taf5, Tal1, Tarbp2, Tbc1d12, Tbc1d2b, Tbkbp1, Tbl1xr1, Tbp1l, Tbx3, Tbx5, Tcf2, Tcf21, Tcf4, Tcfap4, Tcta, Tcte1, Tead3, Tead4, Tera, Tfrc, Tgfb1, Tgfb3, Tgif, Tgif2, Tgoln1, Tgoln2, Thbs1, Thra, Tia1, Timp3, Tle4, Tlk1, Tln1, Tmc7, Tmcc3, Tmem110, Tmem127, Tmem135, Tmem164, Tmem168, Tmem23, Tmem30a, Tmem41a, Tmem55a, Tmem55b, Tmem65, Tmod2, Tmpo, Tmprss11f, Tmprss2, Tnfaip8l3, Tnfrsf1b, Tnfsf11, Tnks2, Tnks2, Tnrc6a, Tnrc6b, Tob1, Topors, Tpp1, Traf3, Traf4, Trib1, Trib2, Trim3, Trim33, Trim35, Trim37, Trmt11, Trp53inp1, Trp53inp2, Trpc7, Trpm6, Tsc1, Tsga14, Tspan18, Tspan5, Tspan9, Tspyl2, Ttc14, Ttc9, Ttl4, Tub, Tuba1, Tuba2, Tuba3, Tuba4, Tuba6, Tuba7, Tusc2, Tut1, Txlna, Txn2, Txndc13, Txnd3, Uba52, Ubap1, Ubb, Ubc, Ube2d1, Ube2j1, Ube2q1, Ube2v1, Ube4b, Ublcp1, Ubr1, Ubx3, Uevld, Ugcgl1, Ugp2, Uhrf2, Ulk1, Ulk2, Usp12, Usp14, Usp2, Usp25, Usp28, Usp31, Usp36, Usp38, Usp42, Usp46, Usp49, Usp1, Vamp8, Vash2, Vaf1, Vav3, Vegfa, Vps26a, Vps37c, Vsx1, Vti1b, Wasf1, Wasl, Wbp7, Wdr22, Wdr32, Wdtd1, Wee1, Wfs1, Wisp1, Wnt1, Wnt7a, Wnt9a, Wnt9b, Wrnip1, Wwp1, Wwp2, X99384, Xk, Xylt2, Yipf4, Yipf6, Yod1, Ythdf3, Ywhah, Zbtb10, Zbtb16, Zbtb39, Zbtb40, Zbtb41, Zbtb43, Zbtb5, Zbtb7a, Zc3h11a, Zc3h3, Zcchc14, Zcchc2, Zdhhc5, Zdhhc8, Zdhhc9, Zfhx1b, Zfhx4, Zfp113, Zfp238, Zfp275, Zfp289, Zfp318, Zfp326, Zfp354a, Zfp354b, Zfp365, Zfp367, Zfp46, Zfp462, Zfp512, Zfp532, Zfp622, Zfp629, Zfp654, Zfp661, Zfp697, Zfp710, Zfp740, Zfp91, Zfpm2, Zfx, Zfyve16, Zfyve20, Zfyve26, Zfyve28, Zmat4, Zmym2, Znrf1, Zswim4, Zswim5

Cdc5  
(8.19E-04)

1110012D08Rik, 1600012H06Rik, 1700021K19Rik, 1810013L24Rik, 1810055E12Rik, 2310046O06Rik, 2700078E11Rik, 2810030E01Rik, 3110004L20Rik, 3732413I11Rik, 4631427C17Rik, 4921505C17Rik, 4921506J03Rik, 4921523A10Rik, 4921533L14Rik, 4932441K18Rik, 4933439F18Rik, 5031439G07Rik, 5330439J01Rik, 5730405I09Rik, 5730406M06Rik, 5830411G16Rik, 5830415L20Rik, 8430427H17Rik, A2bp1, Aak1, Abca1, Abcg4, Abl2, Acsl4, Acsl4, Actr1a, Actr2, Acvr2a, Adam10, Adamts15, Adipor2, Adrb2, Adrb3, Ahctf1, Al450540, Al848100, Akt3, Aktip, Ank2, Ankfy1, Ankib1, Ankrd52, App, Arhgap12, Arhgap20, Arid3a, Arid3b, Arid4b, Arl2, Armc8, Arrdc4, Asah3l, Ash1l, Atbf1, Atp1b4, Atp2b2, Atp7a, Atrx, AU042671, AW548124, Axin2, B3galt1, B630005N14Rik, Bach1, Baz2a, BC030046, BC049806, Bcl11b, Bcl2l11, Bcl2l2, Bnip2, Braf, Brms1l, Btg2, Bzw1, C030034L19Rik, C330019G07Rik, C630007B19Rik, Cacnb4, Cald1, Calm1, Calm2, Calm3, Calu, Cask, Cbara1, Cbfa2t3h, Cbx5, Cbx6, Ccdc100, Ccnd1, Ccnd2, Ccne1, Ccnj, Ccnt2, Cd164, Cd2ap, Cd69, Cdc25a, Cdc37l1, Cdv3, Cfl2, Cldn12, Cmpk, Col12a1, Col19a1, Col1a2, Col24a1, Col27a1, Cpeb3, Crcf1, Creb1, Crem, Cry2, Ctdspl2, Chd9, D130011D22Rik, D130059P03Rik, D230004J03Rik, D5Ert40e, D630023B12Rik, D7Wsu128e, Dab1, Dcamk1l, Dcbl2, Dcp1a, Dcun1d3,

Ddx19b, Dlc1, Dlst, Dll1, Dmtf1, Dnaja2, Dnajb9, Dock4, Dpp10, Dtx2, E030049G20Rik, E130014J05Rik, E2f1, E2f5, Eda, Edem1, Edg1, Eea1, Efnb1, Efnb2, Eif2c4, Eif4e, Eif4g2, Eif5b, Ell2, Entpd7, Epha4, Epha7, Erc1, Ergic2, Etf1, Etnk1, Evi5, Ezh1, Farp1, Fbxo28, Fbxo33, Fcho2, Fgf4, Fign, Fnbp4, Fndc3a, Fndc3b, Fnip1, Foxp2, Frs2, Fubp1, Furin, G3bp2, Galnt1, Gatm, Gcap14, Ggnbp1, Ghr, Glt8d3, Gnal, Gnaq, Golga1, Golga4, Golga7, Gpatch2, Gpc6, Gpc6, Gpr157, Gpr63, Gramd3, Grm7, Habp4, Hand1, Has2, Hic2, Hif1an, Hipk1, Hmga1, Hmga2, Hoxb4, Hoxd1, Ihpk1, Insr, Itga8, Itpr1, Jazf1, Jsd1, Kcna1, Kcnab1, Kcnc2, Kcnj2, Kif1b, Kif5a, Kif5c, Klf12, Klf8, Klhl29, Klhl29, Kpna1, Kpna4, Lamc1, Lats2, Lba1, Leprotl1, Lhfpl2, Lhx9, Limd2, Limk2, Lin28, Lonrf3, Lphn1, Lrba, Lrig1, Lrig2, Lrrc58, Lrrn6a, Lsm11, Luzp1, Map2k4, Map3k1, Map3k14, Map3k3, Mapre1, Marcks, Mcl1, Mecp2, Mfap3l, Mfn2, Mgl1, Mier3, Mink1, Mkrn1, Mmd, Mnt, Mtmr3, Mtmr4, Myb, Mycbp, Mycl1, Mylip, Myo10, Myo1b, Myt1l, Nap1l1, Narg1, Nat8l, Ncoa3, Nefm, Nek9, Neo1, Neurog2, Nfatc3, Nfic, Nfic, Nlk, Nova1, Npas3, Nptxr, Nr6a1, Nras, Nrbp1, Nrp2, Nufip2, Ocl1, Odz2, Onecut2, P140, Pafah1b1, Pafah1b2, Pak7, Papd5, Pappa, Pard3b, Pbx1, Pbx2, Pbx3, Pcaf, Pcdha1, Pcdha11, Pcdha12, Pcdha7, Pcdhac1, Pcdhac2, Pcgf3, Pcyt1b, Pdgra, Pdpk1, Perq1, Pfn2, Pgm2l1, Phf19, Phtf2, Pik3r1, Pitpna, Plagl2, Plxna2, Plxnc1, Pom121, Pou4f2, Ppargc1b, Ppm1e, Ppp2r1b, Prei3, Prkar2a, Prrx1, Prtg, Pten, Ptgrn, Ptpn15, Ptpn4, Ptprd, Ptprj, Ptpro, Punc, Pvr1, Qk, Rab10, Rab11fip4, Rab5a, Rab5b, Rab8b, Rad21, Rai16, Rap2c, Rarb, Rassf2, Rb1, Rbbp7, Rbl2, Rbpsuh, Reep1, Rev3l, Rgs16, Rgs8, Rnf12, Rnf38, Rnf38, Rnf44, Rps6ka5, Rrm2, Rsb1, Rybp, Sall4, Saps3, Satb2, Sec24a, Sema3a, Sema4g, Sertad2, Sertad2, Sgk, Sgk3, Sh3gl2, Shoc2, Siri7, Ski, Skil, Slc12a5, Slc16a9, Slc24a2, Slc25a27, Slc25a36, Slc30a1, Slc31a1, Slc36a1, Slc40a1, Slc41a1, Slc4a4, Slc6a15, Slc6a5, Slco5a1, Slitrk4, Smad5, Smad6, Smad7, Smarcd1, Smoc2, Snx16, Snx30, Socs6, Socs7, Sp8, Spry4, Spryd4, Srgap3, Srpr, Stard13, Stat3, Six17, Styx, Suhw2, Synj1, Taf5, Tbl1xr1, Tcf4, Tera, Tgfbr1, Tgfbr3, Tle4, Tlk1, Tmcc1, Tnrc6a, Tnrc6b, Tob2, Tor1aip2, Trhde, Trim33, Trim33, Trip11, Trp53inp1, Tsc1, Tsga14, Tspan5, Ttc14, Ttn, Tusc2, Ube2d1, Ube2v1, Ube2w, Ugcgl1, Usp14, Usp31, Usp49, Vash2, Vegfa, Vldlr, Wasl, Wdr37, Wdtd1, Wee1, Wnt9b, Xpo7, Xrn1, Ypel1, Ypel2, Ythdf3, Ywhah, Ywhaq, Zbtb10, Zbtb16, Zbtb39, Zbtb41, Zbtb43, Zbtb7a, Zc3h12c, Zc3h12c, Zc3hav1l, Zcchc2, Zfhx4, Zfp148, Zfp275, Zfp367, Zfp644, Zfp697, Zfp704, Zfp710, Zfp91, Zfyve26

---

**Supplementary Table 3.** Oligonucleotides used for Chromatin Immunoprecipitation assay. F, forward; R, Reverse;

| miRNA transcript    | Primer ID          | Sequence (5'-3')          |
|---------------------|--------------------|---------------------------|
| <i>miR-23a-24-2</i> | miR-23a-F(1)       | ACAGCCCTTGGTCTTGACGA      |
|                     | mir-23a-R(2)       | CTGCCAATCTAGAGGTCAGCCT    |
| <i>let-7i</i>       | let-7i-F(3)        | AACCTGTAAAAGAGAAGCAAAACGA |
|                     | let-7i-R(4)        | TAGGCACGGTTTGGAAAGAGAG    |
| <i>mir-143-145</i>  | mir-143-145-F(7)   | GCCTGGTCTACATGTGTCTCTGTT  |
|                     | mir-143-145-R(8)   | GATCTTTGGGAGTCATTTGGTGAC  |
| <i>mir-15a-16-1</i> | mir-15a-16-1-F(9)  | CCTTCTTTTAGCAAGCACACACA   |
|                     | mir-15a-16-1-R(10) | AAAGCTTAGAACGTGCCTTCCA    |
|                     | mir-15a-16-1-F(11) | AGAACCGCGTTCCTTGTC        |
|                     | mir-15a-16-1-R(12) | GCTCTGGATCCGCAGGTG        |
| <i>mir-22</i>       | mir-22-F(13)       | GATCTCCCAGACACGGAAACA     |
|                     | mir-22-R(14)       | GAGCAAGAGGCGGGATCTC       |
| <i>mir-23b-24-1</i> | mir-23b-24-1-F(15) | GCAGCACTTGGAGGCTAGGTT     |
|                     | mir-23b-24-1-R(16) | TTCTGAAGTGCCTGCTATTTGG    |
| <i>mir-221-222</i>  | mir-221-F(17)      | ATTTCAAATCAGACATTTTCCTGCT |
|                     | mir-221-R(18)      | TGAACGAGGCAACTGTCCAA      |
| <i>mir-106b-25</i>  | mir-106b-F(19)     | ATCTTGGGACTGTTCGTGTGTAAC  |
|                     | mir-106b-R(20)     | CCTACCTACTGCAGCTATCTCCGA  |
|                     | mir-106b-F(21)     | GATCTGGCAATCTTTCAACGG     |
|                     | mir-106b-R(22)     | CGAGTCTAGATTGAATGACAAGGG  |
| <i>mir-15b-16-2</i> | mir-15b-16-2-F(25) | ATTCGCGGGTCCCAGAAA        |
|                     | mir-15b-16-2-R(26) | CTAAAATCCAAACTCGAACGGAA   |
| <i>mir-199a-1</i>   | mir-199a-1-F(29)   | GCACTGTCGAGCCCTGAGTAA     |
|                     | mir-199a-1-R(30)   | AGCTTCGGGCCAGTGAGAC       |
| <i>let-7a-7d</i>    | let-7a-F(31)       | ACACGACTTGTCATCACCG       |
|                     | let-7a-R(32)       | TGACAGGCTCCTCTTCCCTACT    |
